# Supplementary material for: Regulation of T cell alloimmunity by PI3Kγ and PI3Kδ
Source: PubMed Central journal article supplement (PMC5643371; doi:10.1038/s41467-017-00982-x), 2017-10-16
Supplement: 41467_2017_982_MOESM1_ESM.pdf [file 41467_2017_982_MOESM1_ESM.pdf]

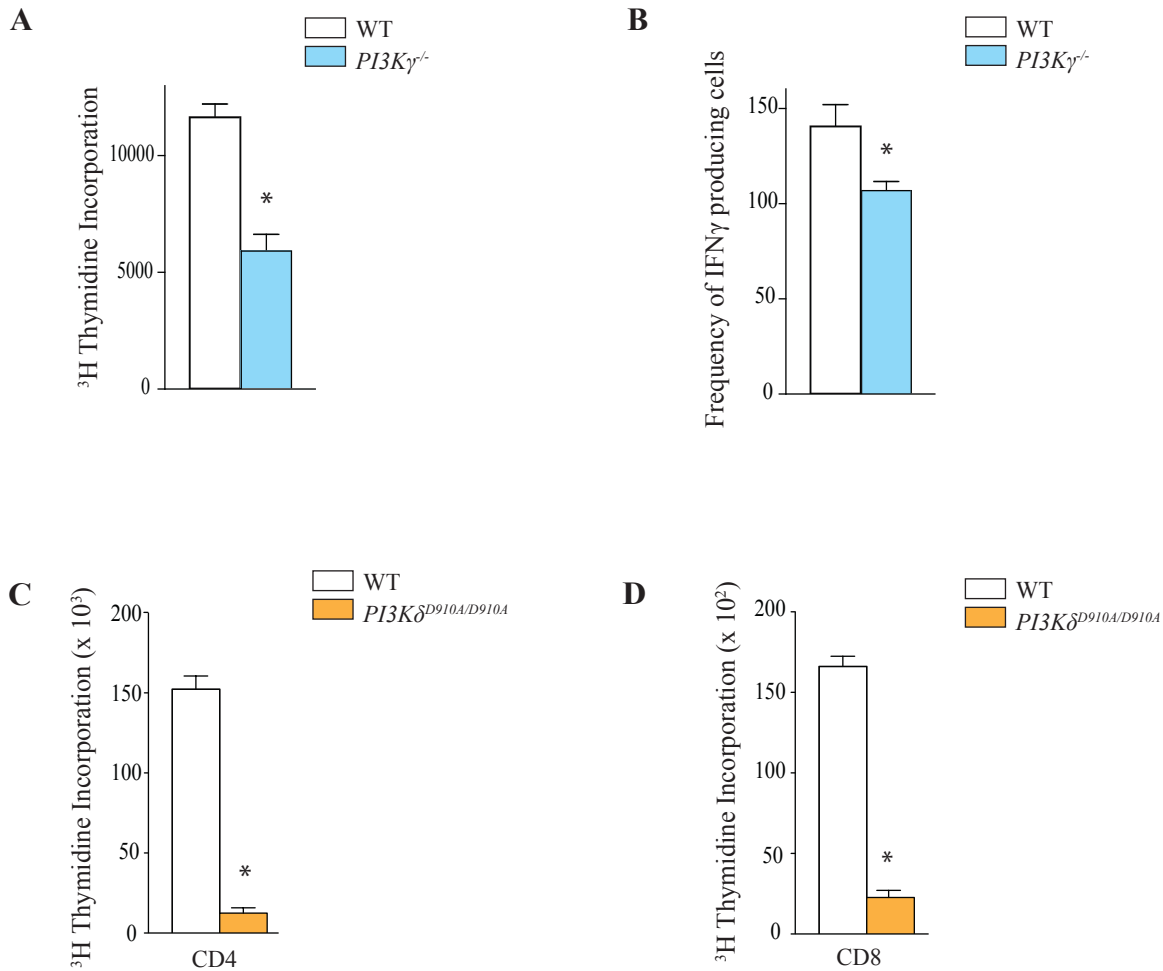

**Supplementary Figure 1: PI3K $\gamma$  or PI3K $\delta$  deletion impairs T cell activation *in vitro*:** (A) *PI3K $\gamma$ <sup>-/-</sup>* splenocytes proliferated significantly less than WT T cells in response to allo-antigens as measured by thymidine incorporation. (B) *PI3K $\gamma$ <sup>-/-</sup>* splenocytes showed a lower frequency of IFN $\gamma$  producing T cells when compared to WT T cells in an ELISpot assay with allo-antigens. (C) *PI3K $\delta^{SD910A/D910A}$*  CD4<sup>+</sup> T cells stimulated with anti-CD3/CD28 *in vitro*, proliferate less than WT T cells as measured by Thymidine incorporation. (D) Significantly lower proliferation of *PI3K $\delta^{SD910A/D910A}$*  CD8<sup>+</sup> T cells stimulated with anti-CD3/CD28 *in vitro*, as compared to WT T cells, as measured by Thymidine incorporation. (Data are representative of three separate experiments, \* $p < 0.05$ , *t*-test,  $n = 3-4$  mice/group, the graphs show data as mean  $\pm$  s.e.m.).

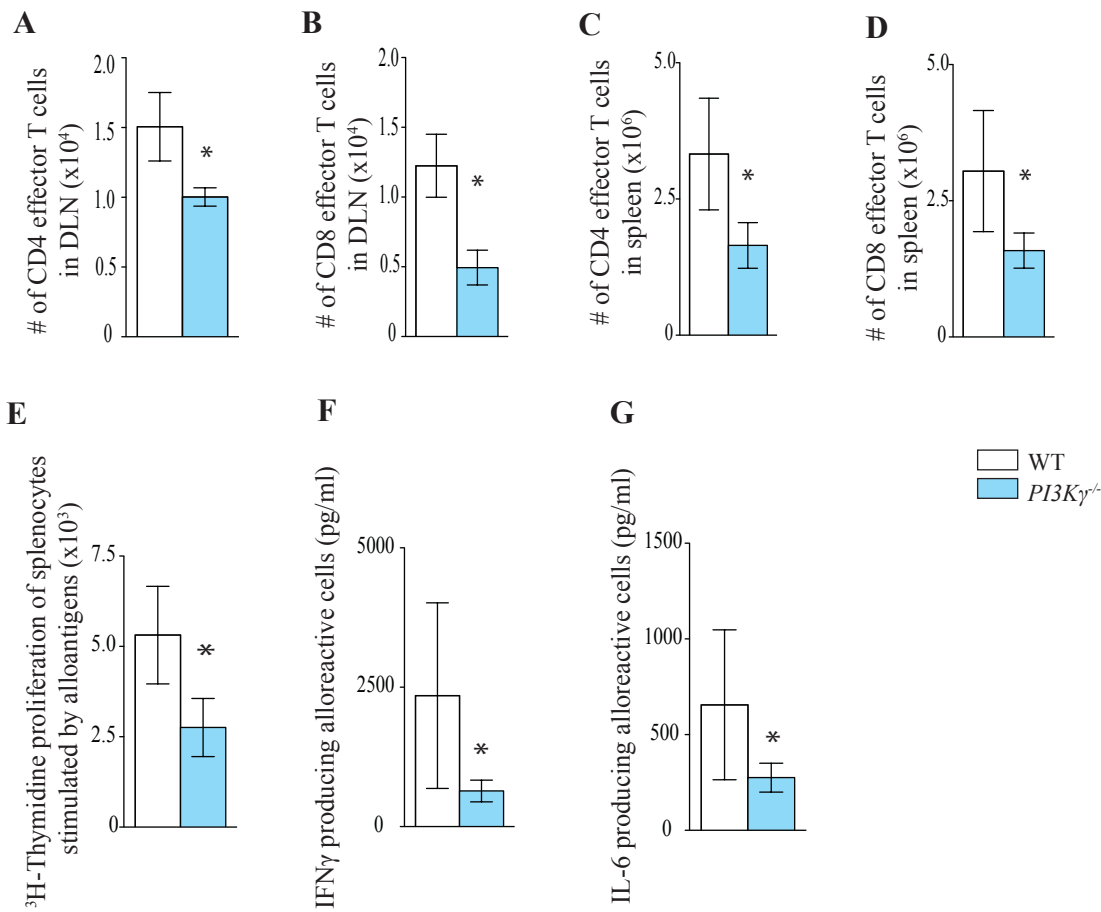

**Supplementary Figure 2: PI3K $\gamma$  deletion suppresses Teff:** Naïve BALB/c heart allografts were transplanted into fully allogeneic C57BL/6 (WT) or  $PI3K\gamma^{-/-}$  recipients. (A) Bar graph represents the absolute count of CD4<sup>+</sup> Teff in DLN in  $PI3K\gamma^{-/-}$  recipients compared to WT at day 7 post-transplant ( $*p < 0.05$ , *t*-test,  $n = 6$ /group). (B) Bar graph represents the absolute count of CD8<sup>+</sup> Teff in DLN in  $PI3K\gamma^{-/-}$  recipients compared to WT at day 7 post-transplant ( $*p < 0.05$ , *t*-test,  $n = 6$ /group). (C) Bar graph represents the absolute count of CD4<sup>+</sup> Teff in splenocytes of  $PI3K\gamma^{-/-}$  recipients compared to WT at day 7 post-transplant ( $*p < 0.05$ , *t*-test,  $n = 6$ /group). (D) Bar graph represents the absolute count of CD8<sup>+</sup> Teff in splenocytes of  $PI3K\gamma^{-/-}$  recipients compared to WT at day 7 post-transplant ( $*p < 0.05$ , *t*-test,  $n = 6$ /group). (E) Bar graph shows that  $PI3K\gamma^{-/-}$  recipient splenocytes proliferated less upon stimulation with donor splenocytes compared to WT. (F) Bar graph represents the level of IFN $\gamma$  in the supernatant collected from the MLR assay as measured by luminex. (G) Bar graph represents the level of IL-6 in the supernatant collected from the MLR assay as measured by luminex ( $*p < 0.05$ , *t*-test,  $n = 4-6$  mice/group). (A-G) The graphs show data as mean  $\pm$  s.e.m. (Teff: effector T cell, DLN: draining lymph node)

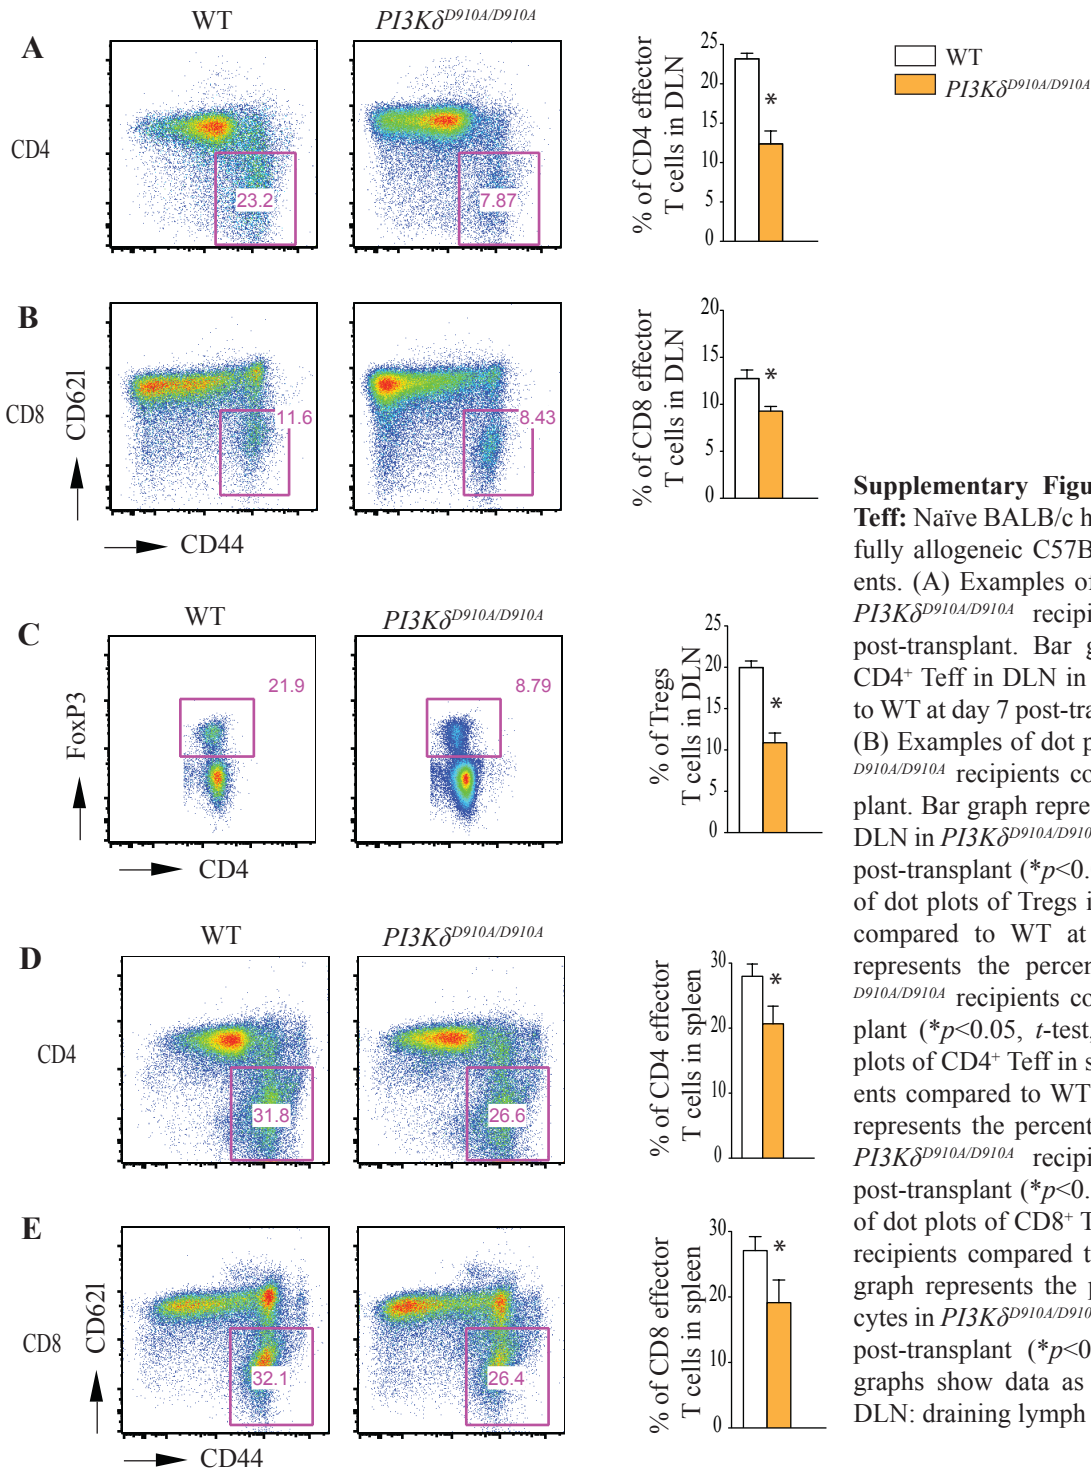

### Supplementary Figure 3: PI3K $\delta$ deletion suppresses Teff:

Naïve BALB/c heart allografts were transplanted into fully allogeneic C57BL/6 (WT) or *PI3K $\delta$ <sup>SD910A/D910A</sup>* recipients. (A) Examples of dot plots of CD4<sup>+</sup> Teff in DLN of *PI3K $\delta$ <sup>SD910A/D910A</sup>* recipients compared to WT at day 7 post-transplant. Bar graph represents the percentage of CD4<sup>+</sup> Teff in DLN in *PI3K $\delta$ <sup>SD910A/D910A</sup>* recipients compared to WT at day 7 post-transplant ( $*p < 0.05$ , *t*-test, *n*=6/group). (B) Examples of dot plots of CD8<sup>+</sup> Teff in DLN of *PI3K $\delta$ <sup>SD910A/D910A</sup>* recipients compared to WT at day 7 post-transplant. Bar graph represents the percentage of CD8<sup>+</sup> Teff in DLN in *PI3K $\delta$ <sup>SD910A/D910A</sup>* recipients compared to WT at day 7 post-transplant ( $*p < 0.05$ , *t*-test, *n*=6/group). (C) Examples of dot plots of Tregs in DLN of *PI3K $\delta$ <sup>SD910A/D910A</sup>* recipients compared to WT at day 7 post-transplant. Bar graph represents the percentage of Tregs in DLN in *PI3K $\delta$ <sup>SD910A/D910A</sup>* recipients compared to WT at day 7 post-transplant ( $*p < 0.05$ , *t*-test, *n*=6/group). (D) Examples of dot plots of CD4<sup>+</sup> Teff in splenocytes of *PI3K $\delta$ <sup>SD910A/D910A</sup>* recipients compared to WT at day 7 post-transplant. Bar graph represents the percentage of CD4<sup>+</sup> Teff in splenocytes in *PI3K $\delta$ <sup>SD910A/D910A</sup>* recipients compared to WT at day 7 post-transplant ( $*p < 0.05$ , *t*-test, *n*=6/group). (E) Examples of dot plots of CD8<sup>+</sup> Teff in splenocytes of *PI3K $\delta$ <sup>SD910A/D910A</sup>* recipients compared to WT at day 7 post-transplant. Bar graph represents the percentage of CD8<sup>+</sup> Teff in splenocytes in *PI3K $\delta$ <sup>SD910A/D910A</sup>* recipients compared to WT at day 7 post-transplant ( $*p < 0.05$ , *t*-test, *n*=6/group). (A-E) The graphs show data as mean $\pm$ s.e.m. (Teff: effector T cell, DLN: draining lymph node, Treg: regulatory T cell)

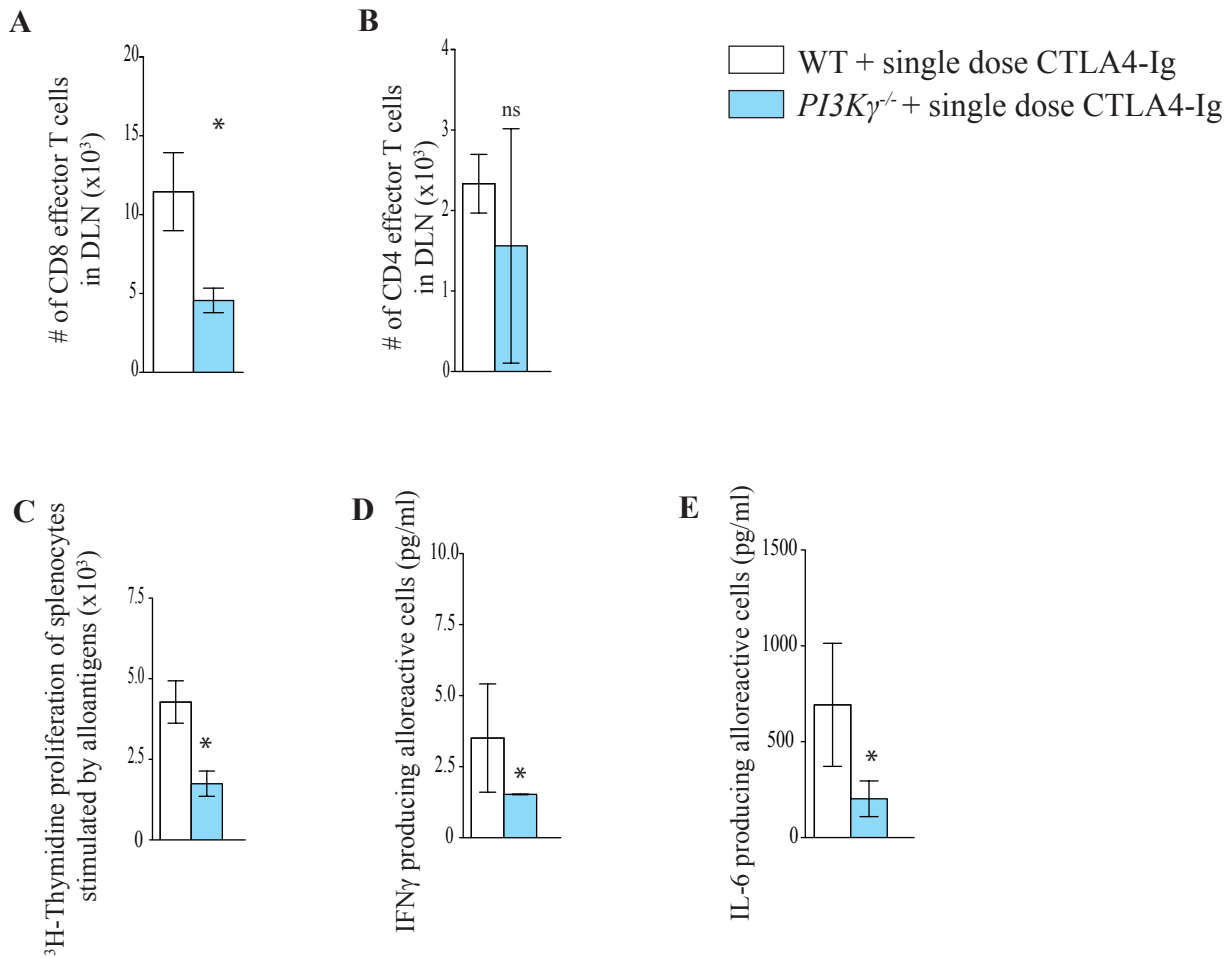

**Supplementary Figure 4: Synergism of single dose CTLA4-Ig and  $PI3K\gamma$  inhibition:** (A) Bar graph represents the absolute count of  $\text{CD8}^+$  effector T cells in the DLN of  $PI3K\gamma^{-/-}$  and WT recipients treated with single dose CTLA4-Ig ( $*p < 0.05$ ,  $t$ -test,  $n=6/\text{group}$ ). (B) Bar graph represents the absolute count of  $\text{CD4}^+$  effector T cells in the DLN of  $PI3K\gamma^{-/-}$  and WT recipients treated with single dose CTLA4-Ig ( $*p < 0.05$ ,  $t$ -test,  $n=6/\text{group}$ ). (C) Bar graph shows that splenocytes from  $PI3K\gamma^{-/-}$  recipients treated with single dose CTLA4-Ig proliferated less upon stimulation with donor splenocytes compared to WT recipients treated with single dose CTLA4-Ig ( $*p < 0.05$ ,  $t$ -test,  $n=3/\text{group}$ ). (D) Bar graph represents the level of  $\text{IFN}\gamma$  in the supernatant collected from the MLR assay as measured by luminex ( $*p < 0.05$ ,  $t$ -test,  $n=3/\text{group}$ ). (E) Bar graph represents the level of IL-6 in the supernatant collected from the MLR assay as measured by luminex. ( $*p < 0.05$ ,  $t$ -test,  $n=3/\text{group}$ ). (A-E) The graphs show data as mean  $\pm$  s.e.m. (DLN: draining lymph node)

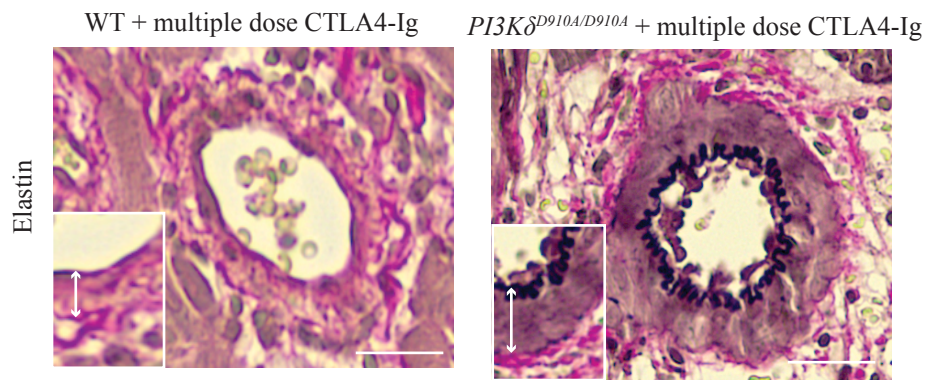

**Supplementary Figure 5: Vascular intima-media thickness:** Vascular intima-medial thickness was observed in cardiac allograft harvested 100 days after transplant. *PI3K<sup>ΔD910A/D910A</sup>* treated with multiple dose CTLA4-Ig showed thicker intima-media compared to WT treated with multiple dose CTLA4-Ig. White arrow shows intima-media thickness (Elastin stain, scale bar; 25 $\mu$ m).

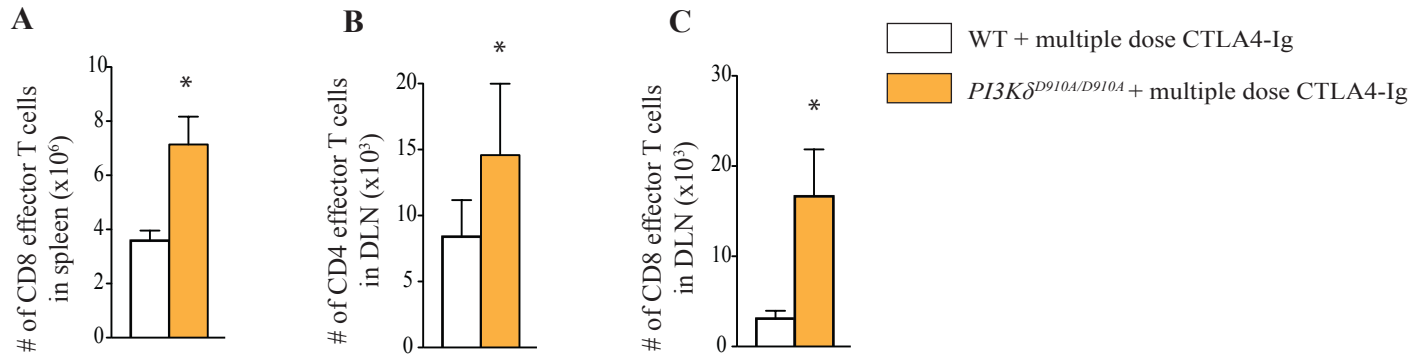

**Supplementary Figure 6: PI3K $\delta$  inhibition stimulates alloimmunity:** (A) Bar graph represents the absolute number of CD8<sup>+</sup> Teff in the spleen of *PI3K $\delta$* <sup>D910A/D910A</sup> and WT recipients treated with multiple dose CTLA4-Ig at day 28 post-transplant (\* $p$ <0.05,  $t$ -test,  $n$ =6/group). (B) Bar graph represents the absolute number of CD4<sup>+</sup> Teff in the DLN of *PI3K $\delta$* <sup>D910A/D910A</sup> and WT recipients treated with multiple dose CTLA4-Ig at day 28 post-transplant (\* $p$ <0.05,  $t$ -test,  $n$ =6/group). (C) Bar graph represents the absolute number of CD8<sup>+</sup> Teff in the DLN of *PI3K $\delta$* <sup>D910A/D910A</sup> and WT recipients treated with multiple dose CTLA4-Ig at day 28 post-transplant (\* $p$ <0.05,  $t$ -test,  $n$ =6/group). (A-C) The graphs show data as mean $\pm$ s.e.m. (Teff: effector T cell, DLN: draining lymph node)

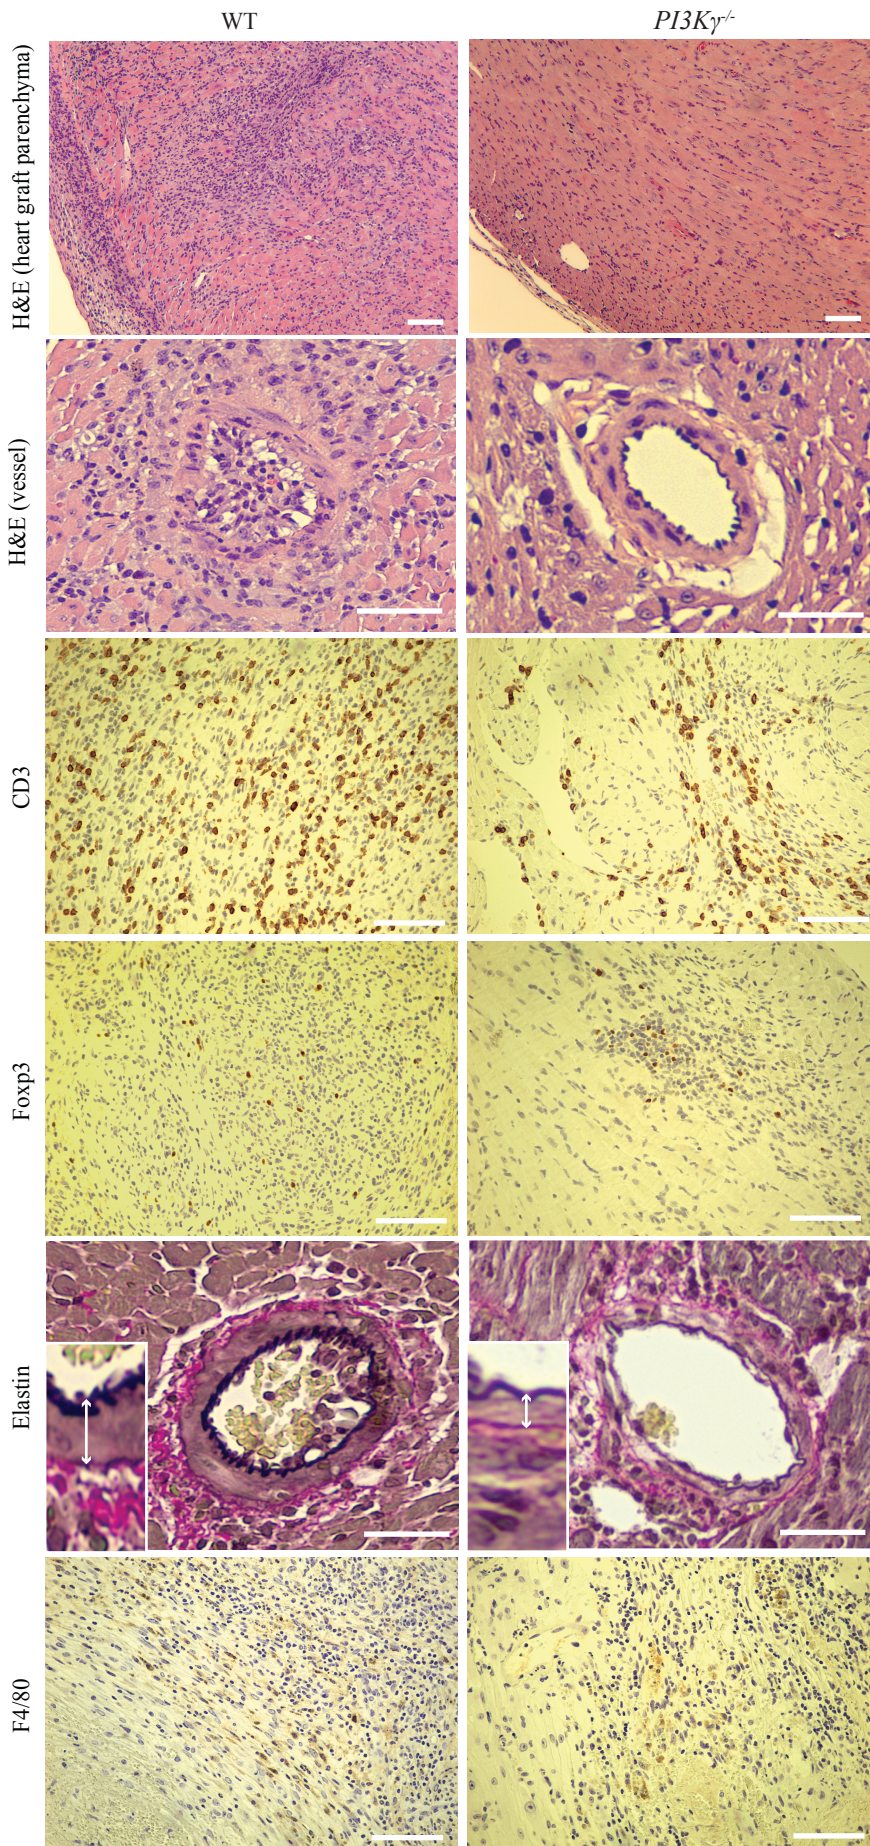

**Supplementary Figure 7: PI3K $\gamma$  deletion protects heart allografts in chronic model:** Heart allografts from B6.H-2<sup>bm12</sup> mice were transplanted into C57BL/6 (WT) or *PI3K $\gamma$ <sup>-/-</sup>* mice and removed from recipients at day 28 post-transplant for histological assessment. Heart allograft histology showed less cellular, CD3 and F4/80 infiltration, and intima-media thickness in the *PI3K $\gamma$ <sup>-/-</sup>* recipients group compared to WT controls (Scale bar, 50 $\mu$ m for H&E heart graft parenchyma, CD3, Foxp3 and F4/80. Scale bar, 25 $\mu$ m for H&E vessel and Elastin stain. White arrow in elastin staining shows intima-media thickness).

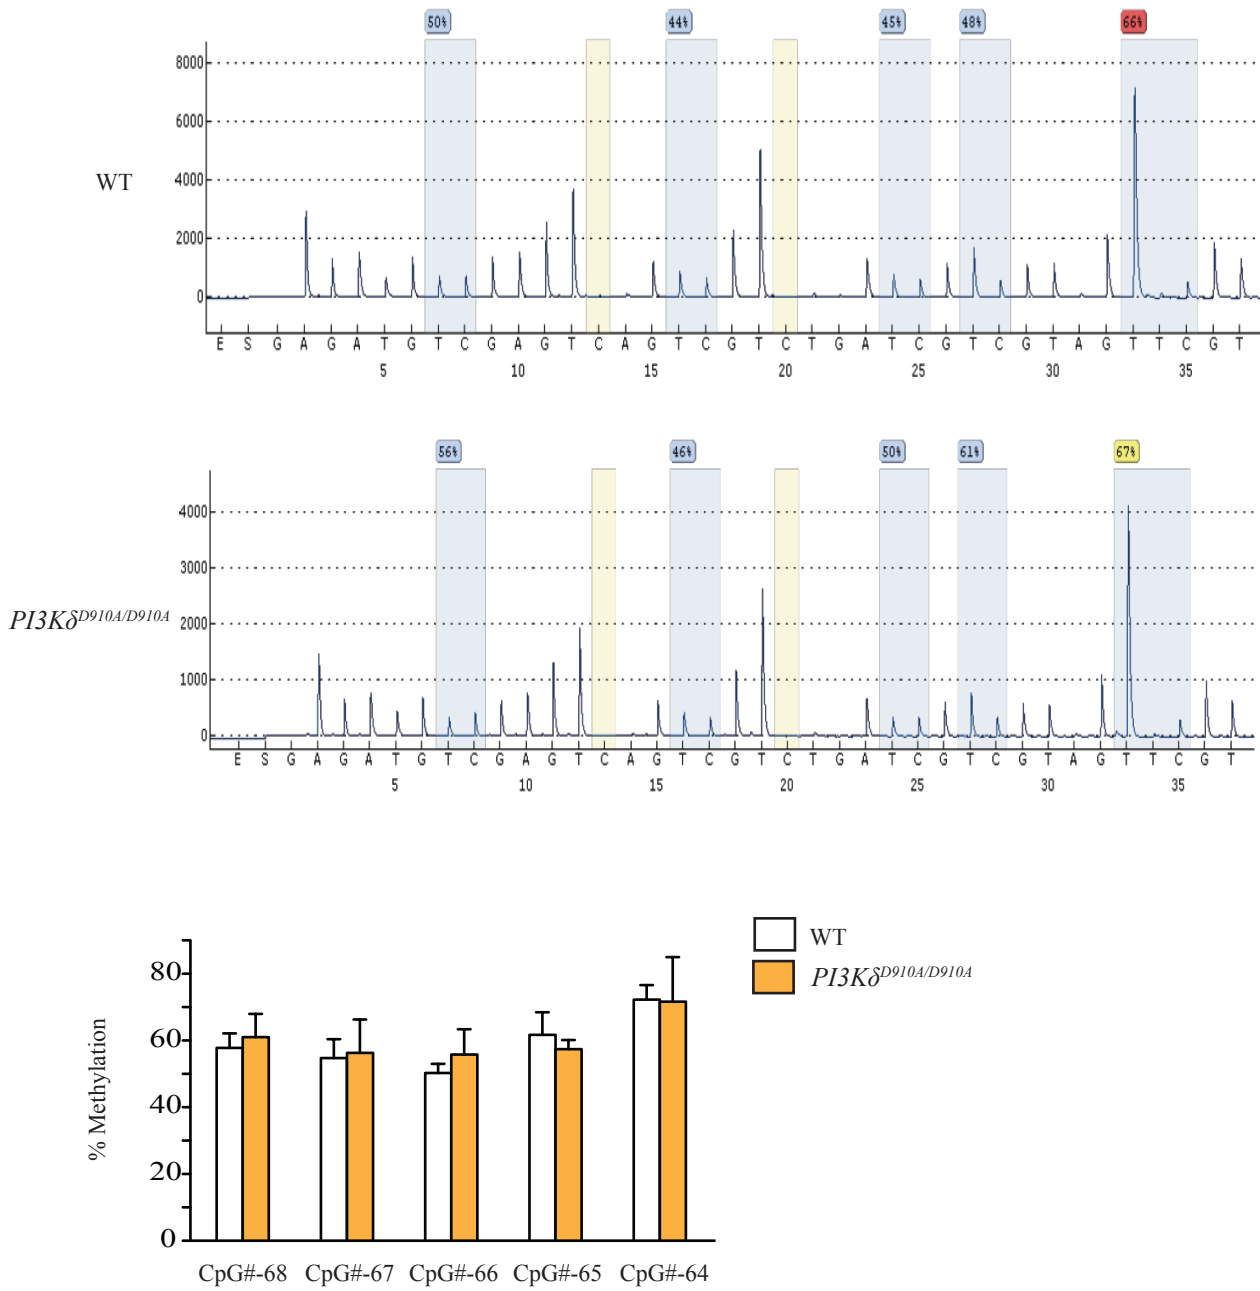

**Supplementary Figure 8: PI3K $\delta$  deletion has no effect on *FoxP3* methylation:** Representative examples of the gene methylation analysis at the five CpG sites of the proximal promoter of *FoxP3* (location: -6750 to -6714 from *ATG*) of Tregs isolated from WT and *PI3K $\delta$ <sup>D910A/D910A</sup>* mice and stimulated *in vitro* for 24 hours. Bar graph quantifies the methylation at each of the five CpG sites ( $p$ =not significant,  $t$ -test,  $n=3$ /group, the graphs show data as mean $\pm$ s.e.m.). (Treg: regulatory T cell)



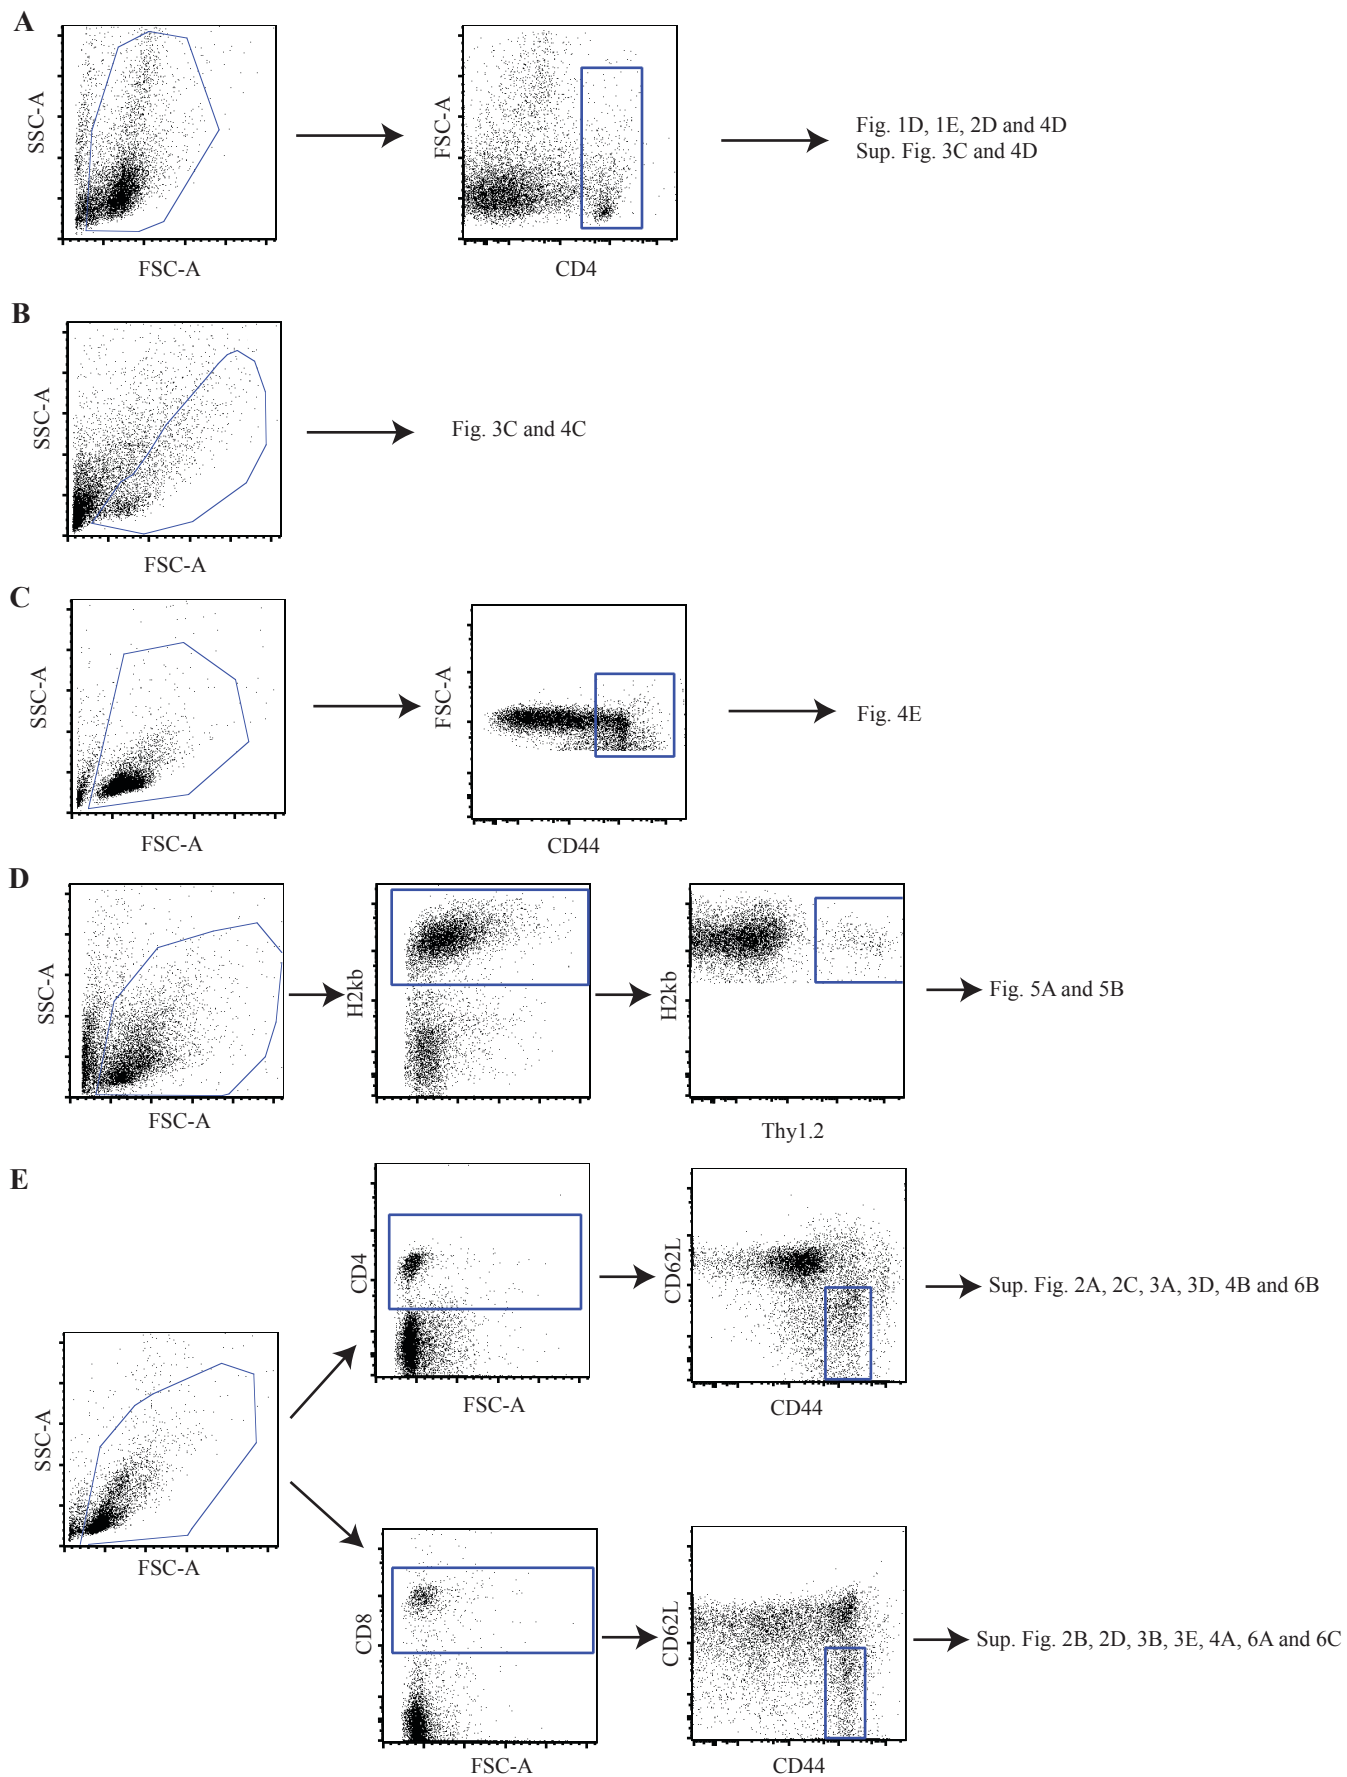

**Supplementary Figure 9: FACS gating strategies:** (A) Sequential gating strategy for CD4<sup>+</sup> Foxp3<sup>+</sup> T cells related to Figure 1D, 1E, 2D, 4D, Supplementary Figure 3C and 4D. (B) Sequential gating strategy for CD4<sup>+</sup> or CD8<sup>+</sup> T cells related to Figure 3C and 4C. (C) Sequential gating strategy for CD8<sup>+</sup> CD44<sup>high</sup> GrB<sup>+</sup> T cells related to Figure 4E. (D) Sequential gating strategy for Annexin or Ki67 CD4<sup>+</sup> Foxp3<sup>+</sup> T cells related to Figure 5A and 5B. (E) Sequential gating strategy for CD4<sup>+</sup> or CD8<sup>+</sup> T effector memory cells (CD62L<sup>+</sup> CD44<sup>high</sup>) related to Supplementary Figure 2A-D, 3A-B, 3D-E, 4A-B and 6A-C.
